# Supplementary material for: ALDOB is a prognostic biomarker and a potential immunotherapy target for clear cell renal cell carcinoma
Source: PeerJ. 2025 Aug 18;13:e19869. doi: 10.7717/peerj.19869 (PMC12369605; doi:10.7717/peerj.19869)
Supplement: Supplemental Information 1 [file peerj-13-19869-s001.xlsx]

## Sheet: Analytical notes
Visiopharm Pathology AI Analysis Software Description
Serial No.	Sports event	Clarification
1	H-score score	Histochemistry score, an abbreviation for histochemical score, is a histological scoring method dealing with immunohistochemistry, which converts the number of positives and their staining intensity in each section into corresponding numerical values for the purpose of semi-quantitative staining of tissues. H-Score (H-SCORE = ∑ (pi × i) = (percentage of weak intensity × 1) + (percentage of modera…
2	Total cell number（Total Nuclei）	Visible light staining was performed using Deep Learning (AI) analysis module in visiopharm software, firstly, all the cell nuclei were identified, the total number of cells was counted, the HDAB-DAB filter was applied, the region to be analyzed (ROI: region of interest) was segmented according to the strength of cell staining (threshold), and the corresponding Label was labeled. The correspondin…
3	Number of weakly positive cells (1+)
4	Number of medium-positive cells (2+)
5	Number of strongly positive cells (3+)
6	cell membrane connectivity	For IHC with cell membrane-specific staining, deep machine learning (AI, Deep Learning) was used, based on the Visiopharm CONNECT™ algorithm, which determines the connectivity of membranes stained with membrane indicators in brightfield digital images of tissue sections by automated image analysis. Output connectivity and score values
7	Cell membrane connectivity score	According to the size of cell membrane connectivity (connectivity) is divided into three levels: ≤ 0 is scored as 0; 0-0.4 is scored as 1; 0.4-0.64 is scored as 2; 0.64-1 is scored as 3.
8	Percentage of positive cells	Analyzes the number of positive cells as a percentage of the total cell count. Reflects high or low ratio of positive cell counts
9	threshold	0-255, a total of 256 levels, the larger the number, the brighter the color. The larger the number in the bright field the closer it is to white, which means the lighter the coloring; the larger the number in the fluorescent field, the brighter the coloring, which means the deeper the coloring.
threshold setting range		0 (dark) - 255 (bright)
Brightfield positive threshold setting range		0-200
1+ Positive threshold setting range		161-200
2+Positive threshold setting range		101-160
3+Positive threshold setting range		0-100

## Sheet: ALDOB 1-100 analyze
Position	1+ number	2+ number	3+ number	1+ positive(%)	2+ positive(%)	3+ positive(%)	Total Nuclei (#)	H-Score [0-300]
(A, 01)	2015	187	5	34.0372	3.15878	0.0844595	5920	40.8566
(A, 02)	4428	2912	204	35.4467	23.3109	1.63305	12492	88.4115
(A, 03)	4711	262	8	71.9676	4.00244	0.122212	6546	80.8331
(A, 04)	3944	330	4	61.8085	5.1716	0.0626861	6381	72.7158
(A, 05)	3062	102	0	56.7668	1.89099	0	5394	60.4815
(A, 06)	5350	1413	12	45.8323	12.1049	0.102801	11673	70.6652
(A, 07)	1960	18	0	24.3237	0.22338	0	8058	24.551
(A, 08)	5493	231	1	62.6268	2.63368	0.0114012	8771	68.5931
(A, 09)	4137	69	0	64.8128	1.081	0	6383	66.9224
(A, 10)	2531	91	2	14.6674	0.527353	0.0115902	17256	15.5879
(A, 11)	9113	43	0	83.9134	0.395948	0	10860	84.6196
(A, 12)	5474	735	9	55.461	7.44681	0.0911854	9870	70.7859
(A, 13)	4794	327	1	72.8571	4.9696	0.0151976	6580	82.9049
(A, 14)	3616	626	5	37.4133	6.47698	0.0517331	9665	50.7061
(A, 15)	1930	4	0	26.5219	0.0549677	0	7277	26.4069
(A, 16)	3234	180	4	27.4463	1.52762	0.0339472	11783	30.3433
(B, 01)	5089	826	27	71.5853	11.6191	0.3798	7109	97.4571
(B, 02)	5299	4337	229	40.5339	33.1752	1.7517	13073	115.333
(B, 03)	4075	66	0	62.2422	1.0081	0	6547	65.6831
(B, 04)	5808	827	14	59.9443	8.53545	0.144494	9689	77.9636
(B, 05)	7957	358	2	89.3042	4.01796	0.0224467	8910	98.1232
(B, 06)	3338	20	0	57.4329	0.344116	0	5812	57.9218
(B, 07)	3120	49	0	75.8017	1.19048	0	4116	77.4489
(B, 08)	6494	1041	8	61.1315	9.79949	0.0753083	10623	81.7413
(B, 09)	854	9	0	21.1858	0.22327	0	4031	21.5522
(B, 10)	5605	1129	17	57.5876	11.5997	0.174664	9733	82.4375
(B, 11)	3965	5	0	45.8806	0.057857	0	8642	45.5953
(B, 12)	5084	269	4	48.7674	2.58034	0.0383693	10425	54.1575
(B, 13)	3879	92	0	61.7479	1.4645	0	6282	64.5535
(B, 14)	5144	588	9	40.4212	4.62046	0.0707214	12726	50.0236
(B, 15)	4654	113	0	62.5958	1.51984	0	7435	65.662
(B, 16)	5714	383	2	57.0544	3.82426	0.01997	10015	64.8924
(C, 01)	3967	404	3	75.9234	7.73206	0.0574163	5225	92.5518
(C, 02)	7154	1579	77	69.7407	15.3929	0.750634	10258	105.199
(C, 03)	5372	200	0	73.1183	2.7222	0	7347	78.7664
(C, 04)	5808	2483	63	52.2443	22.3352	0.5667	11117	100.174
(C, 05)	5019	125	0	63.3712	1.57828	0	7920	66.2101
(C, 06)	4599	396	11	40.4699	3.48469	0.0967969	11364	47.7297
(C, 07)	5562	130	1	62.7128	1.46578	0.0112752	8869	65.501
(C, 08)	5517	990	9	58.511	10.4995	0.0954502	9429	80.6863
(C, 09)	5367	160	0	66.8868	1.99402	0	8024	70.6196
(C, 10)	4637	623	4	51.3624	6.90075	0.0443066	9028	65.5947
(C, 11)	3630	113	0	42.2437	1.31502	0	8593	44.7228
(C, 12)	5801	1098	4	61.4448	11.6301	0.0423684	9441	85.6211
(C, 13)	5559	296	0	80.7173	4.29795	0	6887	90.1245
(C, 14)	4412	751	27	47.0563	8.00981	0.287969	9376	64.8178
(C, 15)	2106	50	0	62.2524	1.47798	0	3383	65.5377
(C, 16)	5292	913	30	49.5088	8.54149	0.280662	10689	67.6935
(D, 01)	2636	45	0	47.4527	0.810081	0	5555	49.02
(D, 02)	7128	1030	0	55.273	7.98697	0	12896	71.6525
(D, 03)	7884	1210	39	60.838	9.33714	0.300949	12959	82.7523
(D, 04)	3596	168	0	39.56	1.84818	0	9090	43.0762
(D, 05)	360	3	0	23.3918	0.194932	0	1539	23.6281
(D, 06)	5897	1573	17	53.8736	14.3705	0.155308	10946	84.2817
(D, 07)	4375	574	5	52.414	6.87672	0.0599018	8347	67.1029
(D, 08)	3883	1192	7	40.8479	12.5394	0.0736377	9506	66.787
(D, 09)	2822	17	0	32.6772	0.19685	0	8636	32.8276
(D, 10)	5572	919	5	53.1426	8.7649	0.0476872	10485	70.8155
(D, 11)	2994	23	0	58.7981	0.451689	0	5092	59.3402
(D, 12)	5407	1127	17	53.5983	11.1717	0.168517	10088	77.3133
(D, 13)	3876	25	0	46.9591	0.302883	0	8254	47.267
(D, 14)	6043	754	7	55.1822	6.88522	0.0639211	10951	69.4615
(D, 15)	419	3	0	53.7179	0.384615	0	780	53.934
(D, 16)	2951	570	5	34.9976	6.75996	0.0592979	8432	48.6897
(E, 01)	6781	435	0	79.2543	5.08415	0	8556	90.5873
(E, 02)	4605	128	1	65.2266	1.81303	0.0141643	7060	69.1892
(E, 03)	4987	115	2	68.2964	1.57491	0.0273898	7302	71.5577
(E, 04)	4154	318	1	53.6346	4.10587	0.0129116	7745	61.9091
(E, 05)	6846	362	2	73.0162	3.86092	0.0213311	9376	80.7934
(E, 06)	6191	1138	8	46.5559	8.55768	0.0601594	13298	64.0154
(E, 07)	5591	228	1	68.6602	2.79995	0.0122805	8143	73.6368
(E, 08)	5764	1096	13	58.234	11.0729	0.13134	9898	81.5068
(E, 09)	5444	68	0	70.3359	0.878553	0	7740	71.7039
(E, 10)	4745	330	5	49.4735	3.44073	0.0521322	9591	56.748
(E, 11)	5940	83	7	49.1763	0.687143	0.0579518	12079	50.1268
(E, 12)	6044	793	4	48.5462	6.36948	0.0321285	12450	62.0494
(E, 13)	5118	40	0	62.9753	0.492187	0	8127	63.7322
(E, 14)	6093	1106	4	59.305	10.765	0.0389332	10274	81.4195
(E, 15)	3417	73	0	64.4109	1.37606	0	5305	66.823
(E, 16)	4526	1095	10	42.7748	10.3487	0.094509	10581	63.9492
(F, 01)	4647	65	0	74.257	1.03867	0	6258	76.3709
(F, 02)	8438	1684	16	65.098	12.9918	0.123438	12962	92.027
(F, 03)	6011	177	1	76.0982	2.24079	0.0126598	7899	80.8224
(F, 04)	6832	1268	10	57.4794	10.668	0.0841326	11886	79.9082
(F, 05)	2134	73	0	67.0226	2.29271	0	3184	71.4958
(F, 06)	5109	396	12	36.9441	2.86355	0.0867742	13829	42.7122
(F, 07)	6813	390	0	61.9871	3.54836	0	10991	69.5776
(F, 08)	8405	122	0	53.4907	0.776427	0	15713	54.8516
(F, 09)	3011	7	0	43.3987	0.100894	0	6938	42.6116
(F, 10)	4603	934	14	37.0016	7.50804	0.11254	12440	52.2252
(F, 11)	6858	293	2	85.2561	3.64247	0.0248633	8044	93.546
(F, 12)	4293	1228	7	44.9247	12.8506	0.0732524	9556	71.7085
(F, 13)	5605	253	3	64.8352	2.92655	0.0347021	8645	71.0471
(F, 14)	5751	118	2	43.4464	0.891441	0.0151092	13237	45.1246
(F, 15)	6654	240	0	72.9285	2.63043	0	9124	78.2408
(F, 16)	6059	377	0	61.9087	3.85205	0	9787	70.071
(G, 01)	6681	632	1	81.9152	7.7489	0.0122609	8156	98.3542
(G, 02)	5204	1852	24	54.4979	19.3947	0.251335	9549	95.9402
(G, 03)	6532	667	3	79.7169	8.1401	0.0366122	8194	98.0697
(G, 04)	8825	191	3	48.3244	1.04589	0.0164276	18262	50.5263
(G, 05)	4344	507	7	68.2054	7.96043	0.109907	6369	83.5248
(G, 06)	4234	570	21	29.8211	4.01465	0.147908	14198	38.3211
(G, 07)	5798	138	2	90.6362	2.15726	0.0312647	6397	95.4924
(G, 08)	4771	1682	22	57.9427	20.4275	0.267185	8234	102.206
(G, 09)	8022	197	1	71.332	1.75173	0.00889205	11246	74.7028
(G, 10)	4482	1435	29	43.3588	13.8822	0.280546	10337	72.4978
(G, 11)	3891	184	0	79.4244	3.75587	0	4899	86.706
(G, 12)	3033	767	12	35.2715	8.91964	0.139551	8599	54.0512
(G, 13)	8452	391	2	85.7201	3.96552	0.020284	9860	94.382
(G, 14)	6407	1261	20	61.4757	12.0994	0.191902	10422	87.6976
(G, 15)	7910	186	2	69.0709	1.62417	0.0174642	11452	72.1197
(G, 16)	5007	1185	8	46.6201	11.0335	0.0744879	10740	70.072
(H, 01)	1609	201	5	62.5827	7.81797	0.194477	2571	80.1107
(H, 02)	4775	641	6	60.1916	8.08017	0.0756334	7933	77.359
(H, 03)	5359	514	1	76.8756	7.3734	0.0143451	6971	92.797
(H, 04)	5237	2114	41	54.3201	21.9272	0.425267	9641	101.15
(H, 05)	695	20	0	33.4295	0.962001	0	2079	35.473
(H, 06)	6632	1605	17	61.4928	14.8818	0.157626	10785	93.6482
(H, 07)	1579	38	0	53.6527	1.2912	0	2943	56.35
(H, 08)	5759	1487	29	55.6103	14.3588	0.280031	10356	87.1197
(H, 09)	6441	508	3	78.6351	6.20193	0.0366256	8191	91.1934
(H, 10)	4698	1222	42	38.483	10.0098	0.344037	12208	59.8929
(H, 11)	5617	277	0	68.9118	3.39836	0	8151	76.706
(H, 12)	1605	351	12	12.1425	2.65547	0.0907853	13218	17.6179
(H, 13)	5989	539	3	72.3571	6.51202	0.036245	8277	85.3044
(H, 14)	2975	1103	10	21.3599	7.9193	0.0717978	13928	37.4112
(H, 15)	10928	134	17	70.3444	0.862568	0.10943	15535	71.7604
(H, 16)	4870	601	4	33.7515	4.16522	0.0277219	14429	42.0892
(I, 01)	6729	348	3	57.4784	2.97258	0.0256257	11707	64.6435
(I, 02)	2313	122	0	15.8295	0.83493	0	14612	17.3709
(I, 03)	5442	884	6	76.8536	12.4841	0.0847338	7081	104.967
(I, 04)	4448	492	16	32.1759	3.55903	0.115741	13824	39.2944
(I, 05)	96	5	0	1.22137	0.0636132	0	7860	1.32583
(I, 06)	819	19	0	8.42419	0.195433	0	9722	8.59062
(I, 07)	4974	190	0	53.141	2.02991	0	9360	57.1703
(I, 08)	2713	952	5	23.3016	8.17659	0.0429443	11643	39.8041
(I, 09)	3492	256	3	51.8101	3.79822	0.0445104	6740	59.8152
(I, 10)	2767	983	13	22.9588	8.15632	0.107866	12052	39.9164
(I, 11)	5399	444	1	40.8057	3.35576	0.00755801	13231	47.5758
(I, 12)	6285	1308	13	59.9599	12.4785	0.124022	10482	86.5105
(I, 13)	1524	61	4	18.2209	0.729316	0.047824	8364	19.7663
(I, 14)	2734	385	8	21.1169	2.97366	0.0617904	12947	27.2622
(I, 15)	3342	149	0	45.1744	2.01406	0	7398	49.1693
(I, 16)	2314	413	2	20.7422	3.70204	0.0179276	11156	27.9744
(J, 01)	1249	70	0	23.6195	1.32375	0	5288	26.1631
(J, 02)	1458	39	0	22.682	0.606721	0	6428	23.6635
(J, 03)	425	12	0	5.79414	0.163599	0	7335	6.03819
(J, 04)	370	5	0	6.46627	0.087382	0	5722	6.60295
(J, 05)	2080	94	1	41.8764	1.89249	0.0201329	4967	45.1132
(J, 06)	2377	96	0	26.8163	1.08303	0	8864	28.9139
(J, 07)	442	12	0	10.9001	0.295931	0	4055	11.4328
(J, 08)	1006	11	0	9.13715	0.0999092	0	11010	9.2363
(J, 09)	985	27	0	10.2338	0.280519	0	9625	10.7313
(J, 10)	1839	21	0	16.0415	0.183182	0	11464	16.2463
(J, 11)	4520	270	2	63.8238	3.81248	0.0282406	7082	72.0523
(J, 12)	889	46	0	7.94034	0.410861	0	11196	8.67988
(J, 13)	174	0	0	5.15098	0	0	3378	5.10114
(J, 14)	1053	323	0	8.47485	2.5996	0	12425	13.5584
(J, 15)	861	65	0	21.1185	1.59431	0	4077	24.2773
(J, 16)	1456	141	0	11.5896	1.12234	0	12563	13.6904
